# Supplementary material for: Prediction of nanomagnetite stoichiometry (Fe(ii)/Fe(iii)) under contrasting pH and redox conditions
Source: Royal Society of Chemistry journal article supplement (doi:10.1039/d2en00112h), 2022-01-01
Supplement: d2en00112h1.pdf [file d2en00112h1.pdf]

## Supporting information

### Prediction of nanomagnetite stoichiometry (Fe(II)/Fe(III)) under contrasting pH and redox conditions

Phoomipat Jungcharoen<sup>1,2</sup>, Mathieu Pédrot<sup>1</sup>, Frank Heberling<sup>3</sup>, Khalil Hanna<sup>4</sup>, Fadi Choueikani<sup>5</sup>,  
Charlotte Catrouillet<sup>1</sup>, Aline Dia<sup>1</sup>, Rémi Marsac<sup>1\*</sup>

<sup>1</sup> Univ. Rennes, CNRS, Géosciences Rennes – UMR 6118, F-35000 Rennes, France.

<sup>2</sup> Department of Environmental Engineering, Faculty of Engineering and Research Center for Environmental and Hazardous Substance Management, Khon Kaen University, Khon Kaen 40002, Thailand

<sup>3</sup> Institute for Nuclear Waste Disposal, Karlsruhe Institute of Technology, P.O. Box 3640, D-76021 Karlsruhe, Germany

<sup>4</sup> Univ Rennes, Ecole Nationale Supérieure de Chimie de Rennes, CNRS, ISCR-UMR 6226, F-35000, Rennes, France.

<sup>5</sup> Synchrotron SOLEIL, L'ormes des Merisiers, Saint Aubin BP48, 91192 Gif sur Yvette cedex, France.

\* Corresponding author: E-mail: [remi.marsac@univ-rennes1.fr](mailto:remi.marsac@univ-rennes1.fr)

**Content:**

**2 tables, 2 figures**

**Table S1.** Model parameters used

|                                                      | <b>Magnetite (Fe<sub>3</sub>O<sub>4</sub>)</b> | <b>Maghemite (Fe<sub>2</sub>O<sub>3</sub>)</b> |
|------------------------------------------------------|------------------------------------------------|------------------------------------------------|
| $\Delta_f G^0_{\text{bulk}}$ (kJ mol <sup>-1</sup> ) | -1012.719                                      | -727.83                                        |
| $\gamma$ (J m <sup>-2</sup> )                        | 0.52                                           | 0.57                                           |

**Table S2.** Effective Fe(II)/Fe(III) ratio  $R_{\text{eff}}$  obtained from chemical analysis and average particle size by TEM for stoichiometric nanomagnetite (R0.5) equilibrated at pH 8 and 4 during 20 days, oxidized products (R0.1), recharged sample (R0.1 + Fe(II) = R0.5).

| <b>Sample</b>    | <b><math>R_{\text{eff}}</math> in solid phase</b> | <b>Particle size by TEM (nm)</b> |
|------------------|---------------------------------------------------|----------------------------------|
| R0.5 at pH 8     | 0.50 ± 0.01                                       | 11.5 ± 1.5                       |
| R0.5 at pH 4     | 0.13 ± 0.01                                       | 8.9 ± 1.9                        |
| R0.1             | 0.10 ± 0.01                                       | 9.6 ± 2.3                        |
| R0.1+Fe(II)=R0.5 | 0.50 ± 0.01                                       | 11.3 ± 2.0                       |

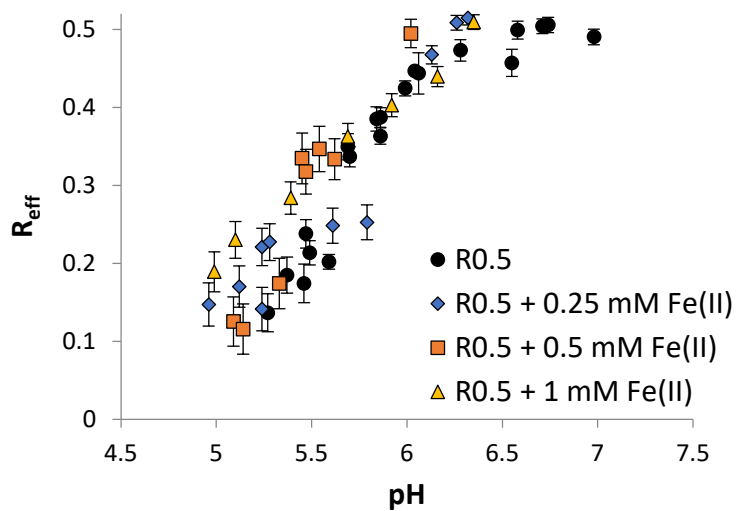

**Figure S1.** Effect of pH and addition of dissolved Fe(II) excess (0.25 to 1 mM) on magnetite effective stoichiometry (for  $R_{ini} = 0.50$ ).

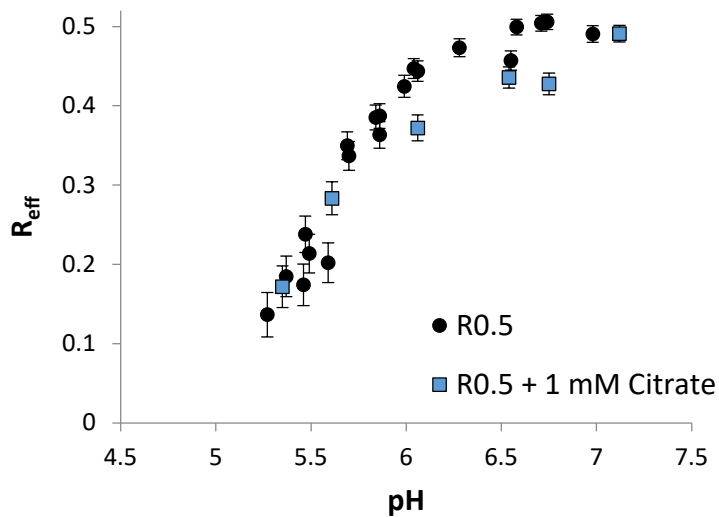

**Figure S2.** Effect of pH and citrate (1 mM) on magnetite effective stoichiometry (for  $R_{ini} = 0.50$ ).
